# Supplementary material
Source: Springer Nature journal article supplement (https://www.springermedizin.de/resource/supplementary/12885_2013_4322_MOESM1_ESM.pdf/9465998)

RQ\_GATA5 mRNA expression

**A**

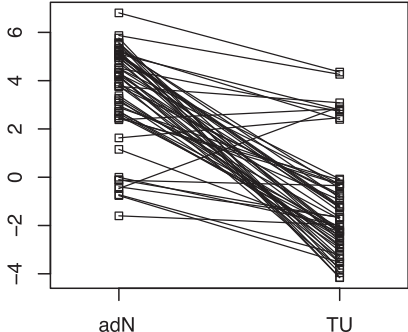

RQ\_GATA5 mRNA expression

**B**

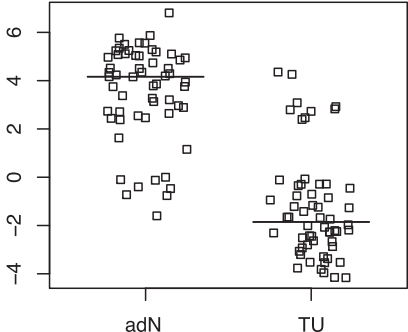

Supplement: MOESM1 [file 9465998]
